# Supplementary material
Source: Springer Nature journal article supplement (https://www.springermedizin.de/resource/supplementary/12990_2009_228_MOESM1_ESM.pdf/9612838)

von Frey 6g

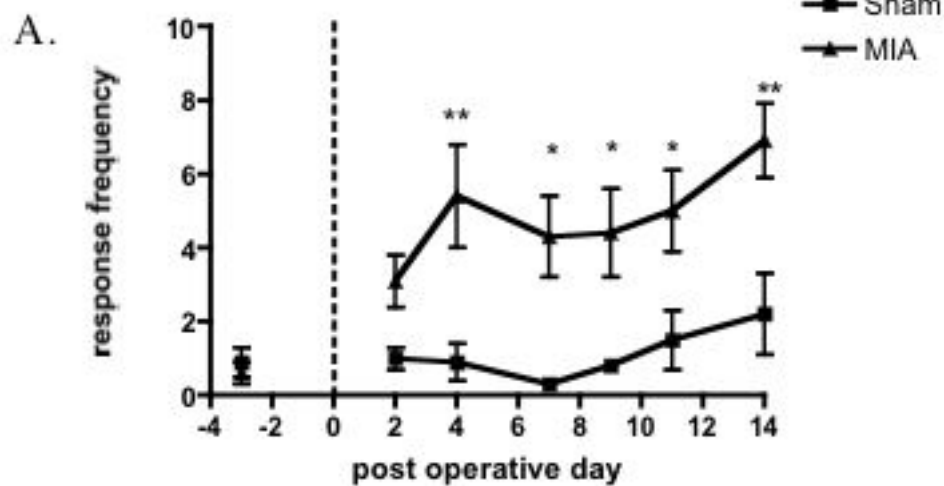

Acetone

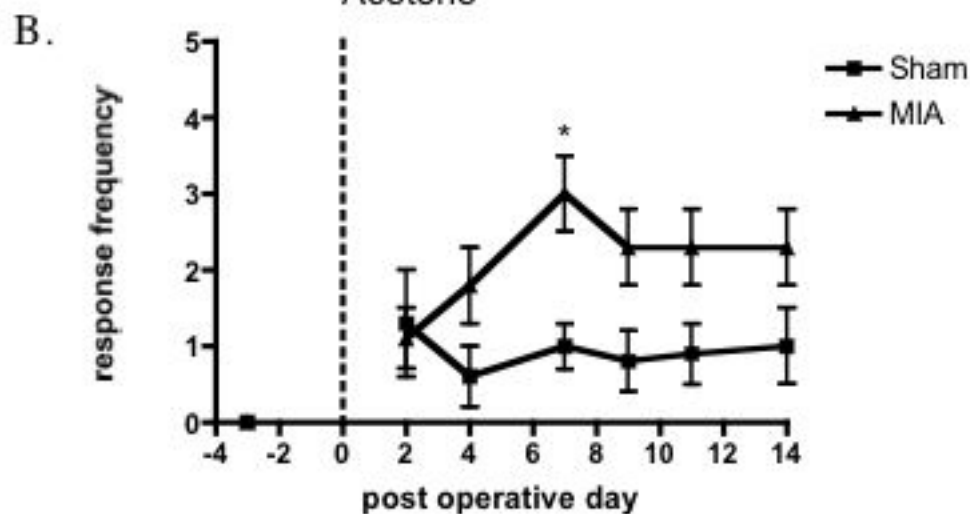

Ambulatory evoked pain

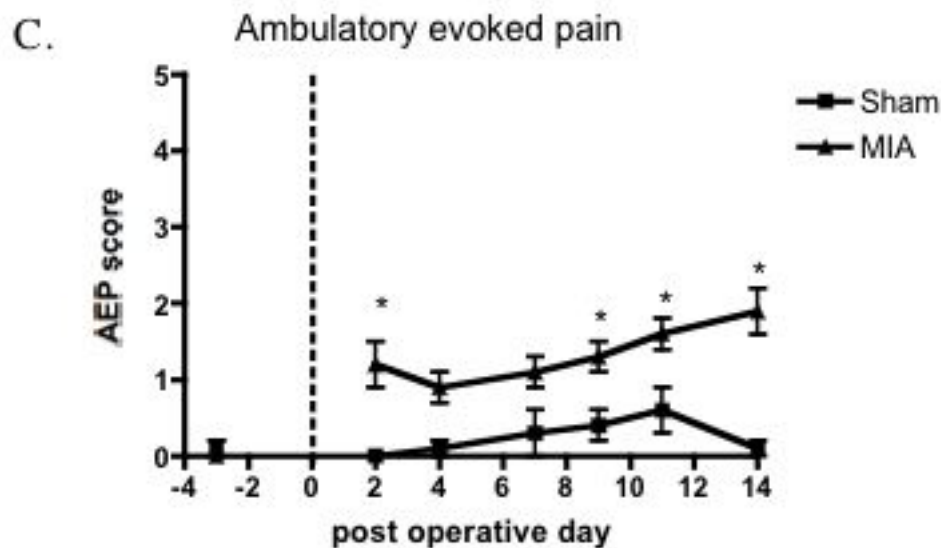

Supplement: MOESM1 [file 9612838]
